# Supplementary material for: Antifouling property of monothiol-terminated bottle-brush poly(methylacrylic acid)-graft-poly(2-methyl-2-oxazoline) copolymer on gold surfaces
Source: Royal Society of Chemistry journal article supplement (doi:10.1039/c4tb01766h), 2015-01-01
Supplement: c4tb01766h1.pdf [file c4tb01766h1.pdf]

## Electronic Supplementary Information

### Antifouling property of monothiol-terminated bottle-brush poly(methylacrylic acid)-graft-poly(2-methyl-2-oxazoline) copolymer on gold surfaces

Xiajun Zheng, Chong Zhang, Longchao Bai, Songtao Liu, Lin Tan, Yanmei Wang\*

CAS Key Laboratory of Soft Matter Chemistry, Department of Polymer Science and Engineering,  
University of Science and Technology of China, Hefei 230026, P. R. china

**Table S 1.** Characterization of PMAA and (PMAA-g-PMOXA)-SH.

| Sample                                          | $\bar{M}_n^a$ (g mol <sup>-1</sup> ) | <i>PDI</i>        | $\bar{M}_w$ (g mol <sup>-1</sup> ) | $\bar{M}_n$ (g mol <sup>-1</sup> ) |
|-------------------------------------------------|--------------------------------------|-------------------|------------------------------------|------------------------------------|
| PMAA <sub>40</sub>                              | 3779                                 | 1.14 <sup>b</sup> | 5280 <sup>b</sup>                  | 4633 <sup>b</sup>                  |
| PMAA <sub>20</sub>                              | 1916                                 | 1.13 <sup>b</sup> | 3084 <sup>b</sup>                  | 2713 <sup>b</sup>                  |
| (PMAA <sub>40</sub> -g-PMOXA <sub>6</sub> )-SH  | 19131                                | 1.16 <sup>c</sup> | 22050 <sup>c</sup>                 | 18980 <sup>c</sup>                 |
| (PMAA <sub>20</sub> -g-PMOXA <sub>6</sub> )-SH  | 9595                                 | 1.27 <sup>c</sup> | 14620 <sup>c</sup>                 | 11480 <sup>c</sup>                 |
| (PMAA <sub>20</sub> -g-PMOXA <sub>12</sub> )-SH | 20152                                | 1.22 <sup>c</sup> | 25880 <sup>c</sup>                 | 21240 <sup>c</sup>                 |

a Calculated by <sup>1</sup>H NMR. The solvent was DMSO for bottle-brush copolymers.

b Obtained by GPC (phosphate buffer saline (pH=7.4) as the eluent, PEG calibration).

c Obtained by GPC/LLS (DMF containing 0.02M LiBr as the eluent).

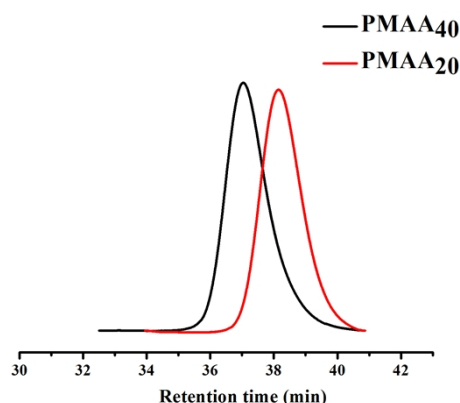

Fig S1. GPC trace of PMAA<sub>40</sub> (black solid) and PMAA<sub>20</sub> (red solid).

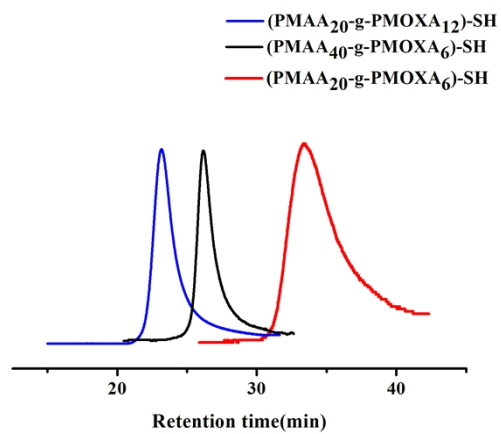

Fig S2. GPC trace of (PMAA<sub>20</sub>-g-PMOXA<sub>12</sub>)-SH (blue solid), (PMAA<sub>40</sub>-g-PMOXA<sub>6</sub>)-SH (black solid) and (PMAA<sub>20</sub>-g-PMOXA<sub>6</sub>)-SH (red solid), respectively.

---
